# Supplementary material
Source: PubMed Central journal article supplement (PMC4907264)

1  
2  
3  
4 hours later by 6 Gy radiation), or DMSO control. Annexin V expression was measured 72 hours  
5  
6  
7 after the last treatment.  
8  
9

10  
11  
12  
13 **Figure 4:** PLX4720 augments radiation antitumor effects *in vivo*. (A) BRAF V600E, firefly  
14 luciferase modified, intracranial xenograft model (AM-38) mice were randomized to control  
15 (DMSO); PLX4720 alone (10 mg/kg over 14 consecutive days); radiation alone (XRT 1 Gy x 3  
16 on alternating days); concurrent PLX4720 (10 mg/kg over 14 consecutive days) + radiation (1  
17 Gy x 3 on alternating days); or sequential XRT (1 Gy x 3 on alternating days), followed by  
18 PLX4720 (10 mg/kg over 14 consecutive days). Combined PLX4720 and radiation therapy  
19 produced statistically significant prolonged survival compared to respective monotherapies. P  
20 values: Concurrent treatment vs control  $p < 0.0001$ ; vs PLX4720  $p = 0.0170$ ; vs radiation  
21  $p = 0.0077$ . Sequential treatment vs control  $p < 0.0001$ ; vs PLX4720  $p = 0.0158$ ; vs radiation  
22  $p = 0.0059$ . There was no difference in survival between concurrent and sequential arms ( $p = 0.57$ ).  
23  
24  
25  
26  
27  
28  
29  
30  
31  
32  
33  
34  
35  
36  
37  
38 **(B and C)** For immunohistochemical analyses, BRAF V600E intracranial xenograft model (AM-  
39 38) mice were sacrificed 6 hours after the final treatment. PLX4720 + radiation significantly  
40 reduced tumor proliferation *in vivo*, assessed by Ki-67 staining, compared to control and each  
41 monotherapy. Combination therapy significantly decreased pMAPK and increased p21 and  
42  $\gamma$ H2AX levels compared to control but not compared to single agents. P values are shown in  
43 Supplemental Table 2.  
44  
45  
46  
47  
48  
49  
50  
51  
52  
53  
54  
55  
56  
57  
58  
59  
60  
61  
62  
63  
64  
65

60  
61  
62  
63  
64  
65  
**Supplemental Figure 1.** Radiation cooperates with PLX4720 to reduce S phase and induce  
apoptosis in BRAF V600E glioma cells. Flow cytometry analyses of (A-B) cell cycle using

1  
2  
3  
4 BrdU and 7-AAD staining; and (C-D) apoptosis using Annexin V staining. Cells analyzed  
5  
6 include (A, C) BRAF WT GBM36 and (B, D) BRAF V600E DBTRG-05MG cells. These  
7  
8 additional cell lines complement the data shown in Figures 2 and 3 and utilize identical methods  
9  
10 to those delineated in Figures 2 and 3.  
11  
12  
13  
14  
15  
16  
17

18 **Supplemental Figure 2.** Flow cytometric *in vitro* measurement of  $\beta$ -galactosidase levels in (A)  
19  
20 GBM36 (BRAF WT) and (B) AM-38 (BRAF V600E) cells reveals higher background levels of  
21  
22 senescence in BRAF V600E cells compared to BRAF WT cells but no pronounced effects of  
23  
24 PLX4720, radiation or their combination on levels of senescent cells.  
25  
26  
27  
28  
29  
30  
31

32 **Supplemental Figure 3.** Immunohistochemical analyses of survival study mice reveals  
33  
34 combination (concurrent) therapy of PLX4720 and radiation significantly decreases tumor  
35  
36 proliferation (Ki-67 staining) and increases cleaved caspase 3 (CC3) compared to control mice.  
37  
38 Comparisons of combination therapy to each monotherapy were not statistically significant.  
39  
40  
41  
42  
43  
44  
45  
46  
47  
48  
49  
50  
51  
52  
53  
54  
55  
56  
57  
58  
59  
60  
61  
62  
63  
64  
65

**Supplemental Table 1.** BRAF V600E inhibition by PLX4720 leads to growth inhibition in BRAF V600E cell lines, but IC50 values were not reached in BRAF WT glioma lines.

| Cell Line         | Genotype | IC50 of PLX4720 by viability               | cell IC50 of PLX4720 by clonogenics |
|-------------------|----------|--------------------------------------------|-------------------------------------|
| <b>DBTRG-05MG</b> | V600E    | 2 uM                                       | 2 uM                                |
| <b>AM-38</b>      | V600E    | 1 uM                                       | 0.5 uM                              |
| <b>GBM8</b>       | WT       | Not reached at 20 uM – increased viability | Growth activation                   |
| <b>GBM39</b>      | WT       | Not reached at 20 uM – increased viability | Growth activation                   |

**Supplemental Table 2.** T-test comparisons of Ki67, pMAPK, p21 and  $\gamma$ H2AX immunohistochemical staining of BRAF V600E tumor xenograft sections treated with PLX4720, radiation or combination (sequential) therapy assessed 6 hours after completion of treatment.

| T-test comparisons p-values    | Control PLX4720 | vs. Control XRT | vs. Control Combination | vs. PLX4720 XRT | vs. PLX4720 Combination | vs. XRT Combination | vs. |
|--------------------------------|-----------------|-----------------|-------------------------|-----------------|-------------------------|---------------------|-----|
| <b>Ki67</b>                    | 0.61            | 1.0             | <b>0.00034</b>          | 1.0             | <b>0.018</b>            | <b>0.010</b>        |     |
| <b>pMAPK</b>                   | 0.084           | <b>0.00073</b>  | <b>0.00017</b>          | 0.31            | 0.064                   | 1.0                 |     |
| <b>p21</b>                     | 0.27            | <b>0.050</b>    | <b>0.0012</b>           | 1.0             | 0.14                    | 0.72                |     |
| <b><math>\gamma</math>H2AX</b> | 0.20            | 0.095           | <b>0.022</b>            | 1.0             | 1.0                     | 1.0                 |     |

## Supplemental Figure 1

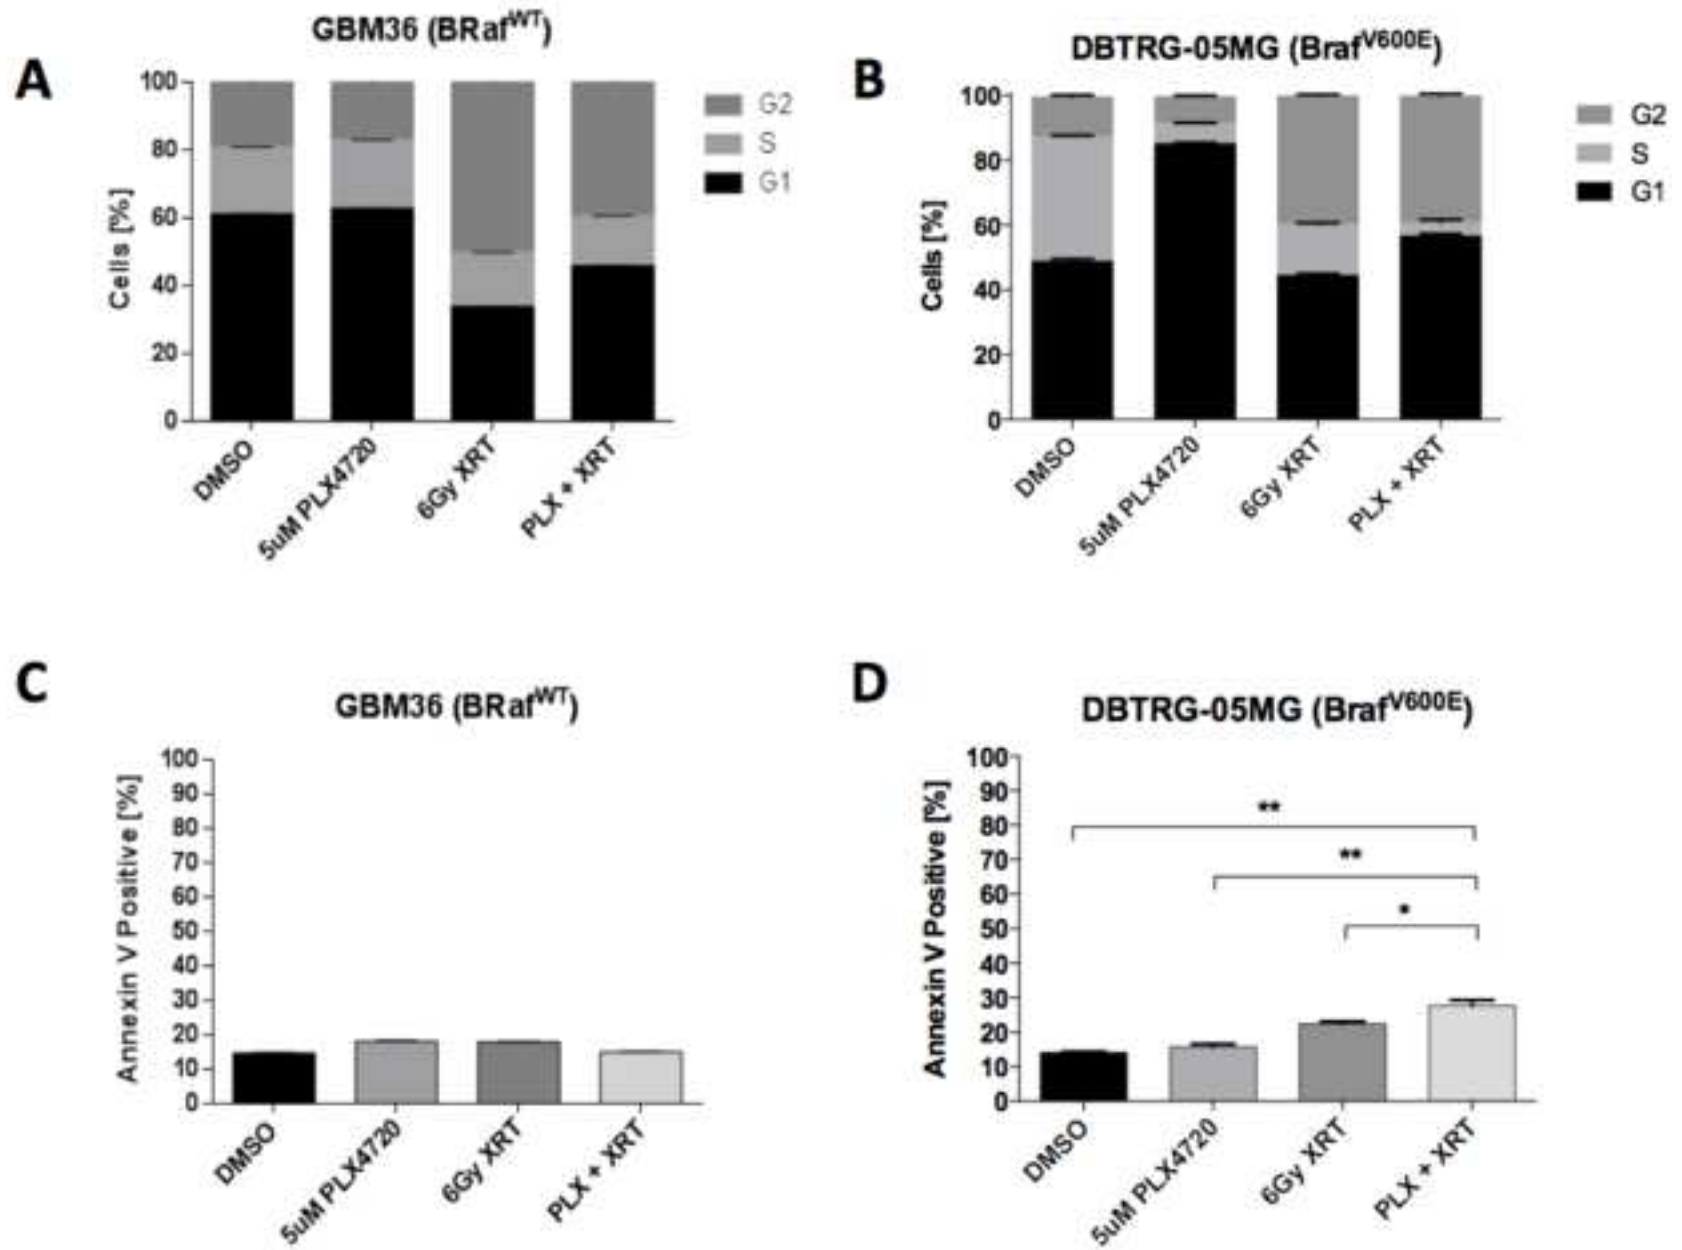

## Supplemental Figure 2

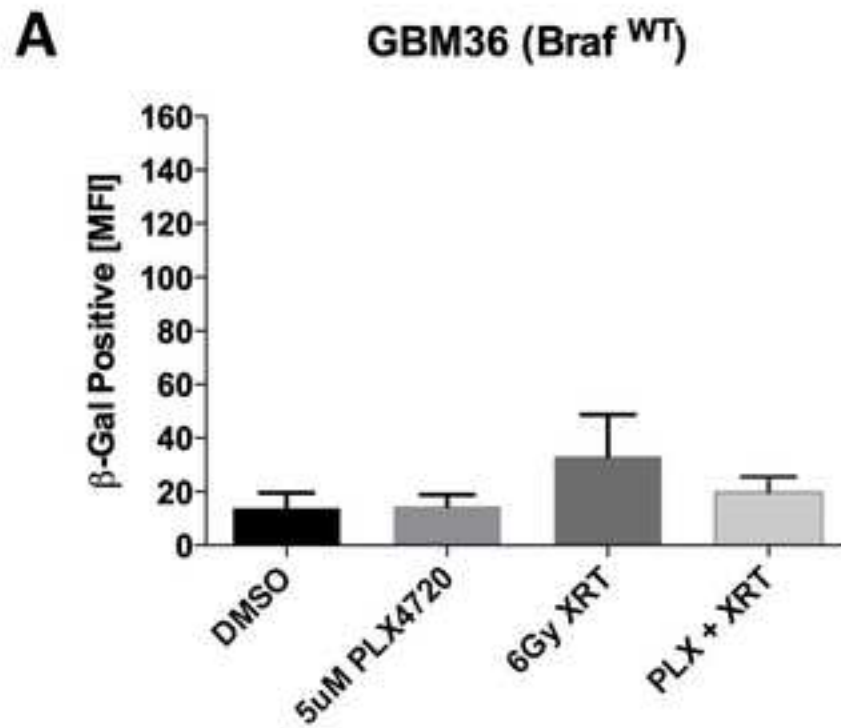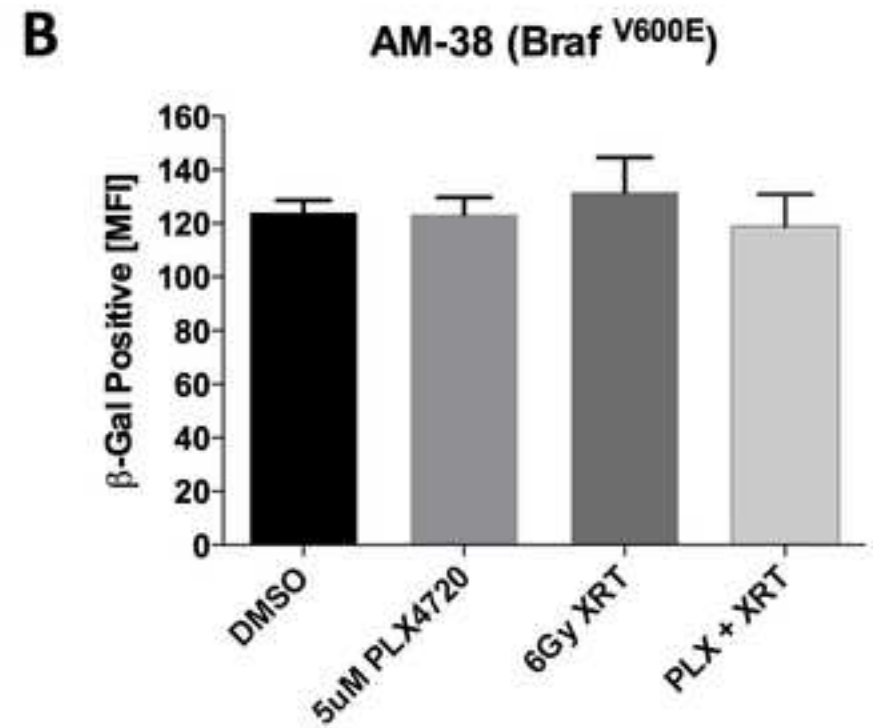

### Supplemental Figure 3

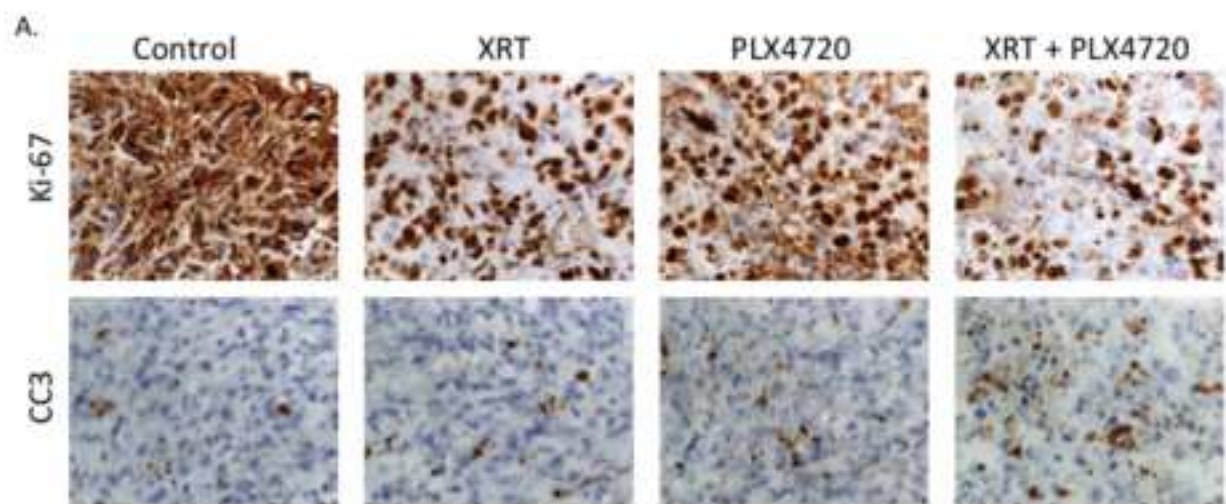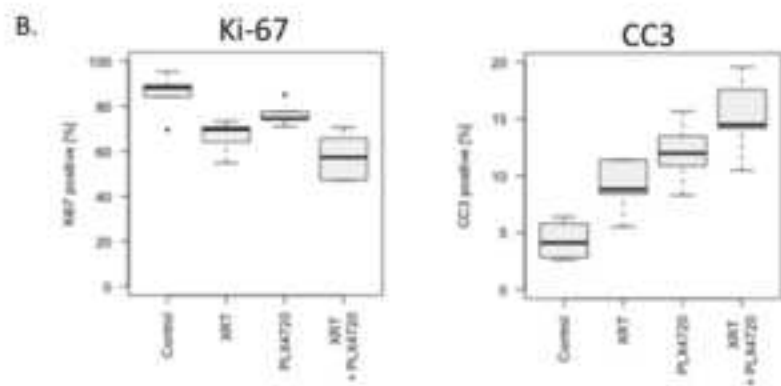

Supplement: NIHMS792232-supplement-supplement_1.pdf [file NIHMS792232-supplement-supplement_1.pdf]
